# Supplementary material for: Molecular Characteristics of Radon Associated Lung Cancer Highlights MET Alterations
Source: MDPI journal article supplement (doi:10.3390/cancers14205113), 2022-10-19
Supplement: s1 [file s1]

## Supplementary tables

**Table S1: Primer for targeted NGS**

| Chrom. | Start     | End       | F-Primer                                  | R-Primer                            | Gen                                                  |
|--------|-----------|-----------|-------------------------------------------|-------------------------------------|------------------------------------------------------|
| chr2   | 29432650  | 29432776  | GGGTGAGGCAGTCTT<br>TACTCA                 | CGTTGTACACTCATCTTC<br>CTAGGGAT      | AMPL403782807<br>ALK Exon25                          |
| chr2   | 29436843  | 29436974  | ACAGGAAGAGCACAC<br>GTCACTTTG              | CTCACTGACAAGCTCCT<br>CGT            | AMPL404264901<br>ALK Exon24                          |
| chr2   | 29443565  | 29443688  | ACTGCAGCAAAGACTG<br>GGTTCTC               | GCTCTGCAGCAAATTCA<br>ACCAC          | AMPL403021863<br>ALK Exon23                          |
| chr2   | 29443688  | 29443772  | CCAATGCAGCGAAC<br>AATGTTCTG               | AGCTGCTGAAAATGTAA<br>CTTTGTATCCT    | AMPL403042136<br>ALK Exon23                          |
| chr2   | 29445200  | 29445332  | GGGTGAGGGTGTCTC<br>TCTG                   | TTGGCTTGCAGGACTCTGT<br>AG           | AMPL403100866<br>ALK Exon22                          |
| chr2   | 29445369  | 29445489  | AAGGGCAGGCTCAA<br>GAGTG                   | CTGTTTGAAGTCTGTCTCC<br>TCTTGT       | AMPL401739236<br>ALK Exon21                          |
| chr7   | 116411701 | 116411801 | CTGTGGCTGAAAAAG<br>AGAAAGCAA              | CAGAACTCATGGGTTTT<br>ATGGACTACAT    | AMPL3669435999<br>cMET Intron 13/14                  |
| chr7   | 116411801 | 116411909 | CGTCGATTCTTGTGTG<br>CTGTCTTAT             | GCATCGTAGCGAACTAA<br>TTCACCTG       | AMPL3669440693<br>cMET Exon14,cMET<br>Intron13/14    |
| chr7   | 116411894 | 116411998 | CGTCTTTAACAAGCT<br>CTTTCTTCTCTCT          | CGGTAGTCTACAGATTC<br>ATTGAAACCA     | AMPL3669509335<br>cMET<br>Intron13/14,cMET<br>Exon14 |
| chr7   | 116411998 | 116412072 | CGAAGTGTAAGCCCA<br>ACTACAGAAA             | ACAACCCACTGAGGTAT<br>ATGTATAGGT     | AMPL3669511201<br>cMET Exon14                        |
| chr12  | 25380167  | 25380240  | AATGTCAGCTTATTA<br>TATTCAATTTAAACC<br>CAC | GCAATGAGGGACCAGTA<br>CATGA          | AMPL387798235<br>KRAS Exon3B,KRAS<br>Exon3           |
| chr12  | 25380240  | 25380357  | GAAAGCCCTCCCCAG<br>TCC                    | GCAGTGTGTAATAATCCAG<br>ACTGTGTTTC   | AMPL3669413793<br>KRAS Exon3B,KRAS<br>Exon3          |
| chr12  | 25398183  | 25398304  | AAAGAATGGTCCTGC<br>ACCAAGTAA              | AGGCCTGCTGAAAATGA<br>CTGAATATAA     | AMPL388868318<br>KRAS Exon2                          |
| chr12  | 25398304  | 25398379  | CCAGCTCCAAGTACC<br>ACAAGT                 | CTGGTGGAGTATTTGAT<br>AGTGTATTAACCTT | AMPL637254406<br>KRAS Exon2                          |
| chr17  | 7577017   | 7577142   | CGCTTCTTGTCTCTG<br>TGCTTA                 | TCCTATCCTGAGTAGTG<br>GTAATCTACTG    | AMPL706844244<br>TP53 Exon8                          |
| chr17  | 7577140   | 7577233   | GCACCTCAAAGCTGT<br>TCCGT                  | CAAGGGTGGTTGGGAGT<br>AGATG          | AMPL388035064<br>TP53 Exon8                          |
| chr17  | 7577392   | 7577509   | GGGATGTGATGAGA<br>GGTGGAT                 | CCATCCTCACCATCATC<br>ACACTG         | AMPL388739660<br>TP53 Exon7                          |
| chr17  | 7577508   | 7577611   | GGCTCCTGACCTGGA<br>GTCTT                  | CATCTTGGGCCTGTGTAA<br>TCTCC         | AMPL387805586<br>TP53 Exon7                          |
| chr17  | 7578141   | 7578234   | GCCACTGACAACCAC<br>CCTTAA                 | GGAAGGAAATTTGCGTG<br>TGGAGTA        | AMPL387841166<br>TP53 Exon6                          |
| chr17  | 7578234   | 7578362   | GTCGAAAAGTGTTTC<br>TGTCATCCAAA            | TCAGATAGCGATGGTGA<br>GCAG           | AMPL706125298<br>TP53 Exon6                          |
| chr17  | 7578310   | 7578425   | GACCTAAGAGCAATCC<br>AGTGAGGAA             | ATCTACAAGCAGTCAC<br>AGCAC           | AMPL1206820909<br>TP53 Exon5                         |
| chr17  | 7578425   | 7578555   | CGCCTCACAACCTCC<br>GTCAT                  | CTCTGTCTCCTTCCTCTT<br>CCTACA        | AMPL707393388<br>TP53 Exon5                          |
| chr17  | 7579278   | 7579385   | GGATACGGCCAGGC<br>ATTGAAG                 | TCATCTTCTGTCCCTTCC<br>CAGA          | AMPL705681709<br>TP53 Exon4                          |
| chr17  | 7579385   | 7579502   | CGTAGCTGCCCTGGT<br>AGGTTT                 | CTGAAGACCCAGGTCCA<br>GATG           | AMPL651471124<br>TP53 Exon4                          |
| chr17  | 7579502   | 7579590   | CTCTGGCATTCTGGG<br>AGCTT                  | ACTGCTCTTTTCACCCAT<br>CTACAG        | AMPL387829477<br>TP53 Exon4                          |

**Table S2: specific genes and exons for targeted NGS panel: NGS\_LUN3\_#3**

| Gen        | FULLNAME                                                               | Exon      |
|------------|------------------------------------------------------------------------|-----------|
|            | HGNC                                                                   |           |
| AKT1       | AKT serine/threonine kinase 1                                          | 4         |
| ALK        | LAK receptor tyrosine kinase                                           | 21 – 25   |
| BRAF       | B-Raf proto-oncogene, serine/threonine kinase                          | 11, 15    |
| CTNNB1     | catenin beta 1                                                         | 3         |
| DDR2       | discoidin domain receptor tyrosine kinase 2                            | 3 – 18    |
| EGFR       | Epidermal growth factor receptor                                       | 18,19, 21 |
| EGFR       | Epidermal growth factor receptor                                       | 20        |
| ERBB2/HER2 | erb-b2 receptor tyrosine kinase 2                                      | 19, 20    |
| KRAS       | KRAS proto-oncogene, GTPase                                            | 2, 3      |
| MAP2K1     | mitogen-activated protein kinase kinase 1                              | 2         |
| MET        | MET proto-oncogene, receptor tyrosine kinase                           | 14        |
| NRAS       | NRAS proto-oncogene, GTPase                                            | 2, 3      |
| PIK3CA     | phosphatidylinositol-4,5-bisphosphate 3-kinase catalytic subunit alpha | 9, 20     |
| PTEN       | phosphatase and tensin homolog                                         | 1 – 8     |
| TP53       | tumor protein p53                                                      | 5 – 8     |

**Table S3: Median overall survivals in months of the radon exposed, matched non-exposed cohort**

| UICC stage | Radon exposed cohort | Matched non-exposed cohort |
|------------|----------------------|----------------------------|
| I          | 107.6 (n=3)          | 45.26( n=12)               |
| II         | 84.47 (n=4)          | 58.84 (n=9)                |
| III        | 39.97 (n=4)          | 34.56 (n=16)               |
| IV         | 16.82 (n=4)          | 10.45 (n=13)               |

Stage-dependent median survivals of the radon-exposed cohort compared with the matched non-exposed cohort.
